# Supplementary material for: Screening of faba bean (Vicia faba L.) accessions to acidity and aluminium stresses
Source: PeerJ. 2017 Feb 8;5:e2963. doi: 10.7717/peerj.2963 (PMC5301972; doi:10.7717/peerj.2963)
Supplement: Data S1 — Detail information on plant material and code, and hematoxyling staining score, taproot length (cm), root regrowth (cm) records in solution culture experiment. [file peerj-05-2963-s001.xlsx]

## Sheet: Plant material and code
Experimental materials	Code
Alexia	F01
Aurora	F02
Babylon	F03
Bulga 70	F04
CS 20 DK	F05
Degaga (R-878-3)	F06
Devine	F07
Disco	F08
DOSHA (COLL 155/00-3)	F09
EH 06006-6	F10
EK 02016-1	F11
Fatima	F12
Gebelcho (EH 96009-1)	F13
GLA 1103	F14
Gora	F15
Hachalu (EH 00102-4-1)	F16
Holetta-2	F17
Kassa	F18
Kontu	F19
KUSE (2-27-33)	F20
Melodie	F21
Messay	F22
Moti (EH 95078-6)	F23
NC 58	F24
OBSE (EH 95073-1)	F25
SSNS-1	F26
Tesfa (75 TA 2626-1-2-1)	F27
Tumsa (EH 99051-3)	F28
Walki (EH 99051-3)	F29
Wayu	F30

## Sheet: Hematoxylin staining score rawd
Accesion code	Hematoxylin score at 82 µmole Al3+ concentration
	Al 2 Rep 1				Al 2 Rep 2				Al 2 Rep 3
	Color level				Color level				Color level
	1	2	3	4	1	2	3	4	1	2	3	4
F01	0	1	2	0	1	3	1	2	3	2	2	1
F02	0	0	3	3	0	3	1	1	2	1	1	0
F03	2	3	3	3	3	3	3	3	3	3	2	3
F04	3	0	0	2	1	1	2	3	3	3	2	1
F05	0	3	2	2	2	2	2	2	3	1	1	3
F06	3	3	2	2	0	2	3	2	3	3	3	3
F07	1	0	1	0	2	3	2	3	1	3	1	3
F09	0	1	0	1	0	0	3	2	0	0	2	1
F10	0	1	2	0	3	3	1	2	2	3	2	1
F11	1	0	0	1	1	3	3	2	2	3	2	1
F12	0	3	2	2	2	2	3	2	2	2	2	3
F13	0	0	1	2	0	2	0	2	0	0	3	2
F14	1	0	1	0	3	2	3	3	1	2	3	3
F15	0	0	1	1	2	2	3	1	1	0	2	2
F16	0	2	1	1	1	3	2	1	2	0	1	2
F17	1	1	0	2	2	0	0	2	3	0	3	2
F18	0	2	2	0	1	3	2	2	3	3	3	3
F19	0	2	3	0	3	3	3	3	2	3	3	3
F20	0	1	0	0	0	3	3	2	3	1	3	2
F21	1	0	1	1	2	2	2	1	3	1	2	1
F22	1	0	2	2	1	2	0	2	2	2	0	3
F23	0	0	2	1	3	1	3	2	2	2	2	3
F24	0	2	1	1	3	0	0	2	1	0	1	2
F25	0	0	2	1	3	3	2	3	3	2	2	3
F26	0	0	1	1	3	3	3	2	2	3	3	3
F27	3	0	0	2	2	3	2	1	1	2	2	2
F28	2	0	2	2	0	2	1	3	3	3	3	3
F29	0	1	1	1	3	2	1	2	3	3	1	0
F30	0	3	2	2	2	2	2	2	2	2	2	2

## Sheet: Taproot length raw data
Accesion code	Taproot Length in cm for Neutral pH Grown Plants
	Neutral pH Rep 1				Neutral pH Rep 2				Neutral pH Rep 3
	Unit root length in cm				Unit root length in cm				Unit root length in cm
	1	2	3	4	1	2	3	4	1	2	3	4
F01	25.1	22.7	26.5	23.6	24	23.5	23.9	20.7	28	21.6	22.7	22.5
F02	19.6	22.1	16	31.5	25.1	23.5	22	21.5	23.3	20.8	27.9	23.9
F03	8	25.7	21.4	21.4	24.6	20.4	21.1	22.3	24	21.1	20.7	26.4
F04	15.9	32.5	29.4	32.1	19.7	18.5	21.7	22.5	22.3	23.1	24.4	24.5
F05	25.1	14.5	28	30.9	25.2	30.7	27.4	20.7	26.4	20.8	22.7	19.7
F06	34.5	31	30.7	29.3	13.3	8.9	19.3	21.5	26.5	25.8	21.3	24.1
F07	28.7	27.1	23.7	28.9	23.3	22.3	22	24.4	23.7	23.1	20.3	25.1
F09	24.5	26.4	30.1	25.8	23.5	19.8	27.4	27.5	26.3	22.8	35.5	19.8
F10	17.6	24.9	18.3	10	26	26.9	25.2	22.1	23	22.2	27.7	26.2
F11	27.2	30.1	33.2	33.3	20.5	22.4	23.7	20.4	26.5	25.7	30.2	26.6
F12	24.7	27.7	22.6	24.7	13.8	16.4	17.2	11.1	29.6	28	26.1	31.1
F13	19.5	23.2	17.2	19.6	16.7	22.5	23.7	21.3	19.2	21.1	15.2	16.4
F14	23.3	24.7	24	23.9	20.3	22.2	20.9	19.9	25.3	27.4	22.8	23.7
F15	14.8	17.6	22	14.6	14.7	17.5	10.6	10	19	27	32.5	26.6
F16	24.9	16.6	23.7	18.7	19.8	18.7	23.9	22.9	27.1	31.5	27.6	22.4
F17	18	24.1	30	28.4	21.8	21.6	19.2	19.6	29.2	36.9	33.3	28.4
F18	25.6	27.3	24.5	18.5	23.1	19.9	19.9	19.4	29.6	21.8	19.8	28.1
F19	29.1	32.6	27.1	24.1	22	24.5	18.8	23.8	22.5	21.7	24	19
F20	30.7	32.7	23.5	23.5	14.9	18.5	17.7	24.1	19	23.3	29.8	24.1
F21	29.4	24	28.8	30.9	11.5	17.4	14.5	11.2	29.5	28.3	27.2	30.5
F22	24.5	29.4	26.2	8.8	24.1	16.2	18.9	18.2	24.4	21.6	24	20.1
F23	18.8	23.3	19.6	22.2	18.7	20	25	22.5	19.7	19	23.5	28.7
F24	23.7	23.2	27.3	16.6	18.8	20.3	19.1	24.9	20.6	31.3	26.5	23.7
F25	21.6	34.6	30.2	31.9	32	26.2	23.7	27	15.2	22.7	29.2	29.8
F26	29.6	26.7	15	20.6	26.1	23.1	14.2	25.3	20.3	11	18.7	22.9
F27	22.9	33.1	25.1	24.2	16.7	16.5	24.2	24.2	31.7	29.6	17	25.5
F28	21.3	23.5	22.4	22.4	23.8	18.3	20	15.4	22.7	28.2	19.6	30.9
F29	20.7	30.1	22.6	15.1	8.4	21.4	10.5	15.8	25.4	21.3	23	22.2
F30	21.1	27	22.5	24.6	17.5	22	21.6	25.8	23	19.3	19.4	22.6
Accesion code	Taproot Length in cm acid Grown Plants
	Acid Rep 1				Acid Rep 2				Acid Rep 3
	Unit root length in cm				Unit root length in cm				Unit root length in cm
	1	2	3	4	1	2	3	4	1	2	3	4
F01	16.4	13.7	23.1	20.4	22.9	10.5	12.6	16.6	20.5	28.1	18.8	25.7
F02	20.2	17.1	18.2	18.7	21.2	10.5	15.9	18.8	22.6	10.5	10.2	10.2
F03	7.7	10.7	15.5	15.5	24.7	14.8	17.7	8.1	19.6	18.5	20.7	12.6
F04	18	13.7	18.2	12.4	20.1	18.8	28.4	23.6	20.5	21.5	19.2	24.7
F05	10.9	18.2	8.7	28.5	17.4	20.1	21.9	20.2	26.6	23.8	18.4	26.6
F06	10.2	13.5	8	11.4	20.5	28	22.1	29.2	24.7	26.1	25.2	19.3
F07	16.3	22.5	14.8	13.4	17.4	17.6	12.5	14.7	18	18.8	15	15.5
F09	17.5	21.1	11.4	22.9	33.3	23.6	16.5	29.1	21.2	30.2	28.1	20.2
F10	9.7	9.8	6.3	11.1	11	8.5	24.1	22.7	28.8	20.3	17.5	23.6
F11	18.3	5.1	23.2	20.1	19.8	24.7	22.2	16.4	30.1	22.7	28.6	27.7
F12	23	22.5	20.2	20.6	17	10.7	19.9	16.8	24.5	27.6	21.2	23.1
F13	13.3	10.4	13.2	18.3	14.1	24.5	12.8	21	16.2	28	18.7	14.1
F14	22.7	19.9	23.6	19.2	20.6	21.6	20.4	22.1	24.5	26.4	24.4	24.2
F15	15.7	12.8	17.6	17.6	16.2	16.8	9.1	9.7	19.5	26.8	24.7	24.5
F16	13.5	12.6	13.8	18.6	15.5	22.7	20	20.9	20.3	20	23.6	20.7
F17	15.9	17.2	12.2	18.1	17.2	15.6	15.4	15.5	20.1	24.2	25.3	20.3
F18	15.4	17.1	15.5	21	25.3	26.2	24	19.1	22.6	28.4	31.5	28
F19	10.9	11.9	17.8	16.5	26.4	21.5	23.6	20.7	28.3	24.1	23.2	22.5
F20	18.6	14.1	13.3	16.9	21.7	28.8	18.5	20.6	23	22.6	29.6	24.7
F21	14.5	21.8	22.4	17.2	14.1	6.7	12.3	8.6	22.4	16.5	27.2	17.7
F22	13.4	13.7	15.8	12.8	15.6	13.6	14.7	10	28	16.2	26	18.7
F23	24.1	12	15.4	21.6	20.7	16.2	14.4	16.7	22	24.8	31.3	25.7
F24	18	18	20.8	14.8	22.6	20.4	28.5	22.5	23.2	24.1	30.8	28.5
F25	13.5	15.7	21.5	14.2	17.1	27.9	22.4	29	25.8	19.6	29.1	28.3
F26	15.3	15.4	19.9	9.1	10.3	21.2	25.2	16.6	18.3	20.5	26.5	21.2
F27	10.5	13.9	14.8	14.8	3.5	18.5	16.7	14.8	19.7	20.5	14.8	14.8
F28	11.3	11.4	20.2	7.1	19.4	17.2	20.4	8.9	19.1	22.6	14.9	18.8
F29	11.4	5.7	17.8	17.8	20.9	19.2	17.5	17.8	21.5	24.5	17.8	21.6
F30	18.9	20	10.1	12.8	19.8	23.4	19	20	21.7	22.3	30.3	21.5
Accesion code	Total Root Length in cm at 82 µmole Al3+ concentration
	Al 2 Rep 1				Al 2 Rep 2				Al 2 Rep 3
	Unit root length in cm				Unit root length in cm				Unit root length in cm
	1	2	3	4	1	2	3	4	1	2	3	4
F01	18.8	22	24.9	25.3	17.2	15.7	18.5	13.9	19.5	21	21	17.5
F02	18.7	14.9	25.9	25	18.6	15.3	12	12.5	17.7	22.7	19.1	15.8
F03	15	13.6	9.3	10.3	14.3	16.4	16.3	15.5	16.8	18.9	19	16.9
F04	22.2	19.7	19	19.8	10.4	16.3	16.1	20.8	22.6	24.1	9.4	21.3
F05	21.4	28.8	18.9	20.3	13.5	18.1	18.5	17.6	21.2	19.8	24.4	20.4
F06	25.5	19.5	17	14.6	16.5	16.6	20.2	16.5	21.1	23.2	23.5	23.2
F07	17.4	15.4	18.8	13.1	12.4	9.2	9.7	6.5	17.5	12.6	16.5	13.1
F09	17.7	21	25.2	29.2	17.5	14.7	22	18.3	23.2	13.6	23	25
F10	23.5	17.2	26.9	23.1	18.6	19.6	17.2	17.9	18.1	24.6	23.3	11.5
F11	18.5	19.2	18	25.9	23	22.1	20.5	24.4	25.2	19.3	22.1	21
F12	19	18.7	24	26.1	14	13.1	14.4	12.3	21.1	21.1	18.8	18.6
F13	17	14.2	21.4	14.3	18.8	17.9	13.2	17.4	22.6	20.7	22.5	17.5
F14	28.1	24	27.1	28	16.4	18	19.2	19.2	22.4	21.7	21.4	19.1
F15	10.1	2.8	9.9	2.6	11.2	8.6	8.4	8	16.1	21.5	14.1	12.7
F16	15	22.5	20	21.9	18.5	16.8	16.5	18.4	20	22	16.5	12.9
F17	17	8.6	17.8	14.6	14.6	15.4	17.3	16.8	20.5	17.4	21.6	19.8
F18	18	16.6	19.4	21	17.4	19.2	11.3	17.5	19.7	20	19.4	19
F19	28.7	28.3	27	26.2	19.9	21.7	25.4	20.4	19.2	20.7	26.3	12
F20	18.1	13.5	16.9	16.6	15.9	15.5	18.9	18.3	23.8	19.4	14.1	25.7
F21	20.7	19.1	17.2	25.6	10.6	7.3	7.1	12.6	9	12.1	5.6	4.8
F22	18	21.9	16.9	23.3	10.4	15.6	19	19	20.7	21	19.7	23
F23	28	21.4	25.6	14.1	18.5	22	19	16.5	22.3	20.4	15	17.5
F24	26.1	26.7	16.6	18.6	20.3	8.6	17.2	18.7	28.6	18.5	22.9	26.5
F25	12.1	22.2	7.9	12.6	18.8	15.4	23.1	19.3	26.9	20.9	26.4	24.1
F26	29.9	17.1	21.1	20.1	11.5	15.7	15	19	22.3	23.6	20.7	12.3
F27	22.1	22.1	16.6	18	12.1	8.5	12.4	12.4	13.3	3.7	4.6	2.6
F28	6	10.4	25.4	17.6	17.1	17.2	14.7	18.7	24.6	19.8	16.6	23.1
F29	17.4	18.2	9.1	18.7	9.6	6.6	4.9	17.6	11.1	13.5	12.7	12.5
F30	17.6	16.1	20	15.9	17.5	15.4	18.6	19	19.7	22.5	23.7	22

## Sheet: Root regrowth raw data
Accesion code	Root Re-growth Length in cm at 82 µmole Al3+ concentration
	Al 2 Rep 1				Al 2 Rep 2				Al 2 Rep 3
	Unit root length in cm				Unit root length in cm				Unit root length in cm
	1	2	3	4	1	2	3	4	1	2	3	4
F01	0.4	0.2	0	0	0.6	0.4	0	0	0.2	0	0	0
F02	0	0	3.3	0	0	0	1.1	0	0	0	5.4	0
F03	0	0	0	0	0	0	0	0	0	0	0	0
F04	0.8	0.1	0.2	0	0	0.2	0	0	1.7	0	0.3	0
F05	0	0	0.7	0	0	0	1.3	0	0	0	0.1	0
F06	0.6	0	0	0.8	0	0	0	0.2	1.2	0	0	1.4
F07	0.7	0	0.1	0.8	0.3	0	0.2	1.6	1.2	0	0	0
F09	1.1	0.4	3.1	0.6	0	0.4	3.4	0.2	2.1	0.3	2.7	1
F10	0	0.8	0	0.5	0	1.5	0	0	0	0	0	1
F11	0.3	0.9	1.6	0.3	0.5	1.9	1.2	0	0	0	1.9	0.6
F12	0.3	0.5	3.9	0.4	0.5	0.3	2.7	0.8	0	0.6	5	0
F13	1.3	0.3	1.9	0	0	0.6	0.5	0	2.6	0	3.2	0
F14	0.8	0	0.7	0.4	1.6	0	1.3	0.7	0	0	0	0
F15	0.8	0.3	0	0.6	1.5	0.6	0	0	0	0	0	1.2
F16	1.6	1.4	2.2	0.9	0.3	0	0.9	0	2.9	2.7	3.5	1.7
F17	0	0	0.8	1.5	0	0	1.5	1.4	0	0	0	1.5
F18	0	0.3	0	0.4	0	0.5	0	0.7	0	0	0	0
F19	0.5	0.3	0	0.5	1	0.3	0	1	0	0.3	0	0
F20	0	0.2	0.8	1.3	0	0	0.1	0.4	0	0.4	1.5	2.1
F21	1.2	1.2	0	1.7	1.2	0.3	0	3.4	1.1	2	0	0
F22	0.2	0	1.3	1.7	0.3	0	2.6	2.6	0	0	0	0.8
F23	2.5	1.6	0	0	1.6	2.6	0	0	3.3	0.6	0	0
F24	2.4	0	0.2	1.2	0	0	0.2	0	4.7	0	0.2	2.4
F25	1.1	1.1	0	0.2	0.6	0	0	0.3	1.6	2.1	0	0
F26	0	0	0	1.4	0	0	0	2.8	0	0	0	0
F27	0.7	0	0.9	1.1	0	0	1.8	1.8	1.3	0	0	0.4
F28	1.8	0	0.3	3.1	0.1	0	0.6	2.1	3.5	0	0	4
F29	1.1	0.4	0.2	0.8	0.6	0	0.3	1.6	1.5	0.8	0	0
F30	0	0	1.4	0.7	0	0	0.7	0.8	0	0	2	0.5
