# Supplementary material for: Screening of faba bean (Vicia faba L.) accessions to acidity and aluminium stresses
Source: PeerJ. 2017 Feb 8;5:e2963. doi: 10.7717/peerj.2963 (PMC5301972; doi:10.7717/peerj.2963)
Supplement: Data S3 — Chlorophyll content (SPAD unit), stomatal conductance (mol H2O/m2/s), canopy temperature (°C), taproot length (cm), shoot and root dry weight (g) records taken in perlite medium verification experiment. [file peerj-05-2963-s003.xlsx]

## Sheet: Chlorophyll content RawData
Data: Chlorophyll content
Date: 28 June 2016
Replication	Accession	Treatment
		Neutral	Acid	Aluminum
1	Aurora	33.7	36	38.6
1	Babylon	37.1	44.1	36.5
1	Dosha	31.6	34.8	37.8
1	EH 06006-6	36.6	36.3	37.6
1	Gebelcho	29.9	36.5	33.1
1	GLA 1103	38.9	37.9	43
1	Kassa	33.1	33.7	38.1
1	Messay	31.1	38.2	37.5
1	NC 58	35.9	34.6	33.2
1	Tesfa	34.3	36	35
2	Aurora	33.6	34.2	37.7
2	Babylon	35.6	41.9	38.7
2	Dosha	28.7	35.8	37
2	EH 06006-6	34.3	36.9	37.6
2	Gebelcho	36.8	34.2	34.4
2	GLA 1103	36.9	39	43.2
2	Kassa	38.3	29.7	38
2	Messay	35.9	35.5	34
2	NC 58	37.1	40.4	34.8
2	Tesfa	33.4	33	37.8
3	Aurora	35.5	34.8	39.1
3	Babylon	35.2	37.4	42.4
3	Dosha	34.6	35.9	36.8
3	EH 06006-6	40.9	32.7	42
3	Gebelcho	34	42.5	35
3	GLA 1103	38.3	41.9	42.7
3	Kassa	31.7	33.1	36.8
3	Messay	33.7	38	36.9
3	NC 58	41.8	34.1	35
3	Tesfa	29.4	32.2	35.2
4	Aurora	30.1	33.1	36.5
4	Babylon	33	46.3	42.6
4	Dosha	31.5	39.7	37.6
4	EH 06006-6	41.2	42.3	42.1
4	Gebelcho	42.5	33.3	37.8
4	GLA 1103	38	38	44
4	Kassa	34.2	29.5	34.5
4	Messay	39	41.1	32.3
4	NC 58	31.9	37.4	37.1
4	Tesfa	35.3	36.3	39.6

## Sheet: Stomatal conductance RawData
Data: Stomatal Conductance
Date: 29 June 2016
	in mol H2O/m2/s
Replication	Accession	Treatment
		Neutral	Acid	Aluminum
1	Aurora	0.682021	0.337125	0.544071
1	Babylon	0.283107	0.374086	0.27395
1	Dosha	0.357185	0.262738	0.311336
1	EH 06006-6	0.247747	0.286317	0.247747
1	Gebelcho	0.351923	0.337125	0.279978
1	GLA 1103	0.374086	0.53091	0.276927
1	Kassa	0.386384	0.323654	0.328008
1	Messay	0.421475	0.292991	0.257514
1	NC 58	0.224783	0.28961	0.204699
1	Tesfa	0.386384	0.296463	0.495269
2	Aurora	0.446158	0.518423	0.303694
2	Babylon	0.311336	0.351923	0.230549
2	Dosha	0.28961	0.228589	0.232547
2	EH 06006-6	0.17075	0.157402	0.142999
2	Gebelcho	0.193456	0.221121	0.226668
2	GLA 1103	0.368257	0.300029	0.322231
2	Kassa	0.175824	0.27395	0.319427
2	Messay	0.162435	0.206213	0.386384
2	NC 58	0.296463	0.276927	0.151979
2	Tesfa	0.303694	0.362627	0.362627
3	Aurora	0.484516	0.429362	0.604681
3	Babylon	0.399618	0.257514	0.20321
3	Dosha	0.357185	0.357185	0.296463
3	EH 06006-6	0.265442	0.182407	0.126406
3	Gebelcho	0.474261	0.296463	0.276927
3	GLA 1103	0.46447	0.640852	0.245436
3	Kassa	0.386384	0.682021	0.362627
3	Messay	0.46447	0.303694	0.307461
3	NC 58	0.283107	0.226668	0.271046
3	Tesfa	0.604681	0.46447	0.292991
4	Aurora	0.660749	0.374086	0.848692
4	Babylon	0.292991	0.209322	0.286317
4	Dosha	0.357185	0.323654	0.307461
4	EH 06006-6	0.238792	0.215879	0.168815
4	Gebelcho	0.4139	0.296463	0.392877
4	GLA 1103	0.815092	0.622201	0.682021
4	Kassa	0.506557	0.484516	0.260096
4	Messay	0.247747	0.193456	0.232547
4	NC 58	0.506557	0.232547	0.380125
4	Tesfa	0.28961	0.271046	0.236668

## Sheet: Canopy temperature RawData
Data: Canopy Temperature
Date: 28 June 2016
Replication	Accession	Treatment
		Neutral	Acid	Aluminum
1	Aurora	21.8	22.1	23.3
1	Babylon	22.5	22.8	22.8
1	Dosha	21.4	21.9	24.7
1	EH 06006-6	24.3	23.7	24.4
1	Gebelcho	22.9	22.5	23.1
1	GLA 1103	22.8	21.7	22.8
1	Kassa	22.3	23.5	22.7
1	Messay	21.2	21.8	23.2
1	NC 58	23	22.9	23.6
1	Tesfa	22	21.8	22.6
2	Aurora	22.8	22.8	22
2	Babylon	23.4	22.7	21.1
2	Dosha	22.3	22.7	22.5
2	EH 06006-6	24.6	23.4	22.8
2	Gebelcho	23.2	24	22.8
2	GLA 1103	24.2	23	22.8
2	Kassa	22.4	23.9	22.8
2	Messay	22.8	24.2	22.2
2	NC 58	21.7	22.8	22.7
2	Tesfa	22.6	22.5	21.5
3	Aurora	21.4	23.5	21.8
3	Babylon	23.2	22.8	23.8
3	Dosha	23.8	24.6	24.1
3	EH 06006-6	22.8	23.6	24.5
3	Gebelcho	22.8	23.2	24.1
3	GLA 1103	22.5	23.5	22.5
3	Kassa	22.6	22.2	20.9
3	Messay	22.1	22.4	23.2
3	NC 58	22.7	23.7	22.1
3	Tesfa	22.1	23.5	22.8
4	Aurora	23.3	22.9	22.6
4	Babylon	23.2	20.5	24.5
4	Dosha	23.8	23.2	23.8
4	EH 06006-6	22.6	23.7	24.1
4	Gebelcho	22.4	22.3	22.1
4	GLA 1103	21.3	20.9	23.1
4	Kassa	24.1	22.9	24.5
4	Messay	22.8	22.7	24.2
4	NC 58	23.2	21.8	23.2
4	Tesfa	20.9	20.5	23

## Sheet: Taproot length
Data: Tap Root Length (cm)
Date: 30 June 2016
Replication	Accession	Treatment
		Neutral	Acid	Aluminum
1	Aurora	46	37	38
1	Babylon	54	38	35
1	Dosha	41	37	51
1	EH 06006-6	49	35	33
1	Gebelcho	37	45	44
1	GLA 1103	50	42	35
1	Kassa	44	35	25
1	Messay	51	38	38
1	NC 58	55	49	37
1	Tesfa	47	35	31
2	Aurora	47	36	38
2	Babylon	57	39	33
2	Dosha	48	45	47
2	EH 06006-6	43	44	38
2	Gebelcho	40	39	41
2	GLA 1103	38	46	39
2	Kassa	40	48	30
2	Messay	52	39	30
2	NC 58	50	44	38
2	Tesfa	56	35	32
3	Aurora	41	31	33
3	Babylon	46	37	33
3	Dosha	36	36	34
3	EH 06006-6	45	38	36
3	Gebelcho	43	29	42
3	GLA 1103	52	48	41
3	Kassa	42	48	42
3	Messay	41	35	37
3	NC 58	40	57	32
3	Tesfa	41	38	33
4	Aurora	37	31	39
4	Babylon	34	37	32
4	Dosha	38	35	37
4	EH 06006-6	51	32	31
4	Gebelcho	39	38	52
4	GLA 1103	44	45	42
4	Kassa	45	38	36
4	Messay	38	34	40
4	NC 58	39	30	40
4	Tesfa	39	35	32

## Sheet: Shoot dry weight RawData
Data: Shoot Dry Weight (g)
Date: 01 July 2016
Replication	Accession	Treatment
		Neutral	Acid	Aluminum
1	Aurora	4.2	2.7	3.34
1	Babylon	4.74	4.3	4.14
1	Dosha	6.28	4.64	6.46
1	EH 06006-6	6.34	5.44	4.52
1	Gebelcho	5.48	4.96	5.62
1	GLA 1103	3.18	2.74	3.06
1	Kassa	5.16	4.74	5.2
1	Messay	3.42	4.64	5.7
1	NC 58	6.3	4.86	5.12
1	Tesfa	5.28	4.36	5.66
2	Aurora	3.4	3.3	2.64
2	Babylon	4.34	4	1.4
2	Dosha	4.72	4.1	3
2	EH 06006-6	6.32	5.3	4.94
2	Gebelcho	5.58	5	4.94
2	GLA 1103	2.68	4.16	2.91
2	Kassa	3.16	3.48	3.16
2	Messay	6.6	3.86	5.34
2	NC 58	4.32	3.06	4.04
2	Tesfa	6.08	3.16	5.14
3	Aurora	2.98	1.78	3.24
3	Babylon	3.4	2.78	2.84
3	Dosha	3.62	3.48	4.08
3	EH 06006-6	4.44	3.76	4.5
3	Gebelcho	4.08	3	4.92
3	GLA 1103	3.38	3.4	3.62
3	Kassa	3.7	3.52	3.26
3	Messay	4.72	4.72	4.2
3	NC 58	2.58	4.94	3.6
3	Tesfa	5.24	3.28	5.14
4	Aurora	1.58	2.72	2.76
4	Babylon	4.22	3.82	2.66
4	Dosha	3.86	4.84	4.26
4	EH 06006-6	5.88	4.84	4.64
4	Gebelcho	3.82	6.32	5.4
4	GLA 1103	2.88	0.62	2.04
4	Kassa	3.44	3.88	3.52
4	Messay	4.12	2.34	3.4
4	NC 58	3.34	4.66	6
4	Tesfa	4.76	6.06	3.64

## Sheet: Root dry weight RawData
Data: Root Dry Weight (g)
Date: 02 July 2016
Replication	Accession	Treatment
		Neutral	Acid	Aluminum
1	Aurora	2	0.92	1.4
1	Babylon	1.72	1.5	1.16
1	Dosha	3.12	1.86	1.54
1	EH 06006-6	2.74	2.42	1.18
1	Gebelcho	1.78	1.7	1.82
1	GLA 1103	1.36	1.54	1.02
1	Kassa	2.12	1.78	1.46
1	Messay	1.12	1.36	1.86
1	NC 58	1.82	1.9	1.34
1	Tesfa	1.58	2.02	1.62
2	Aurora	1.64	1.62	1.6
2	Babylon	1.7	1.44	0.74
2	Dosha	1.94	1.82	1.32
2	EH 06006-6	2.02	1.89	1.66
2	Gebelcho	1.96	2.22	1.78
2	GLA 1103	1.02	1.52	1.59
2	Kassa	1.04	1.58	1.4
2	Messay	2.52	1.32	1.9
2	NC 58	1.44	1.02	1.2
2	Tesfa	2.08	1.16	1.68
3	Aurora	1.8	1.4	1.84
3	Babylon	1.58	1.26	1.4
3	Dosha	1.46	1.62	1.78
3	EH 06006-6	2.02	2.04	3.06
3	Gebelcho	1.8	1.42	1.92
3	GLA 1103	1.8	1.8	1.86
3	Kassa	1.78	1.54	1.52
3	Messay	1.4	1.32	1.38
3	NC 58	1.04	1.72	1.6
3	Tesfa	1.72	1.24	1.76
4	Aurora	1.56	1.26	1.22
4	Babylon	1.76	1.68	1.4
4	Dosha	1.72	1.82	1.08
4	EH 06006-6	2.88	1.88	1.7
4	Gebelcho	1.64	2.38	1.98
4	GLA 1103	1.44	0.44	1.88
4	Kassa	1.56	1.54	1.5
4	Messay	1.92	0.8	1.28
4	NC 58	1.54	1.78	1.8
4	Tesfa	1.56	2	1.52
