# Supplementary material for: Screening of faba bean ( Vicia faba L.) accessions to acidity and aluminium stresses
Source: PeerJ journal article supplement (doi:10.7717/peerj.2963), 2017-02-08

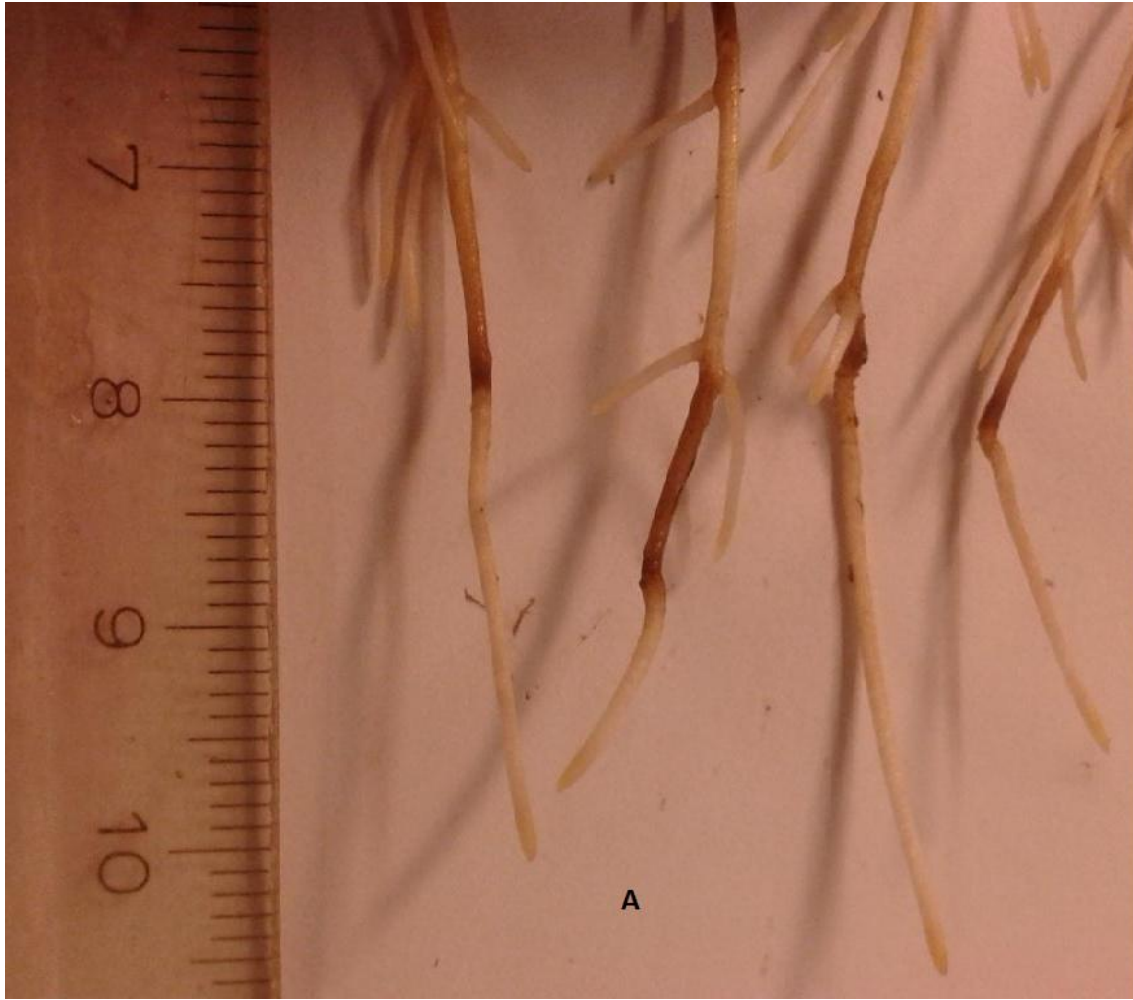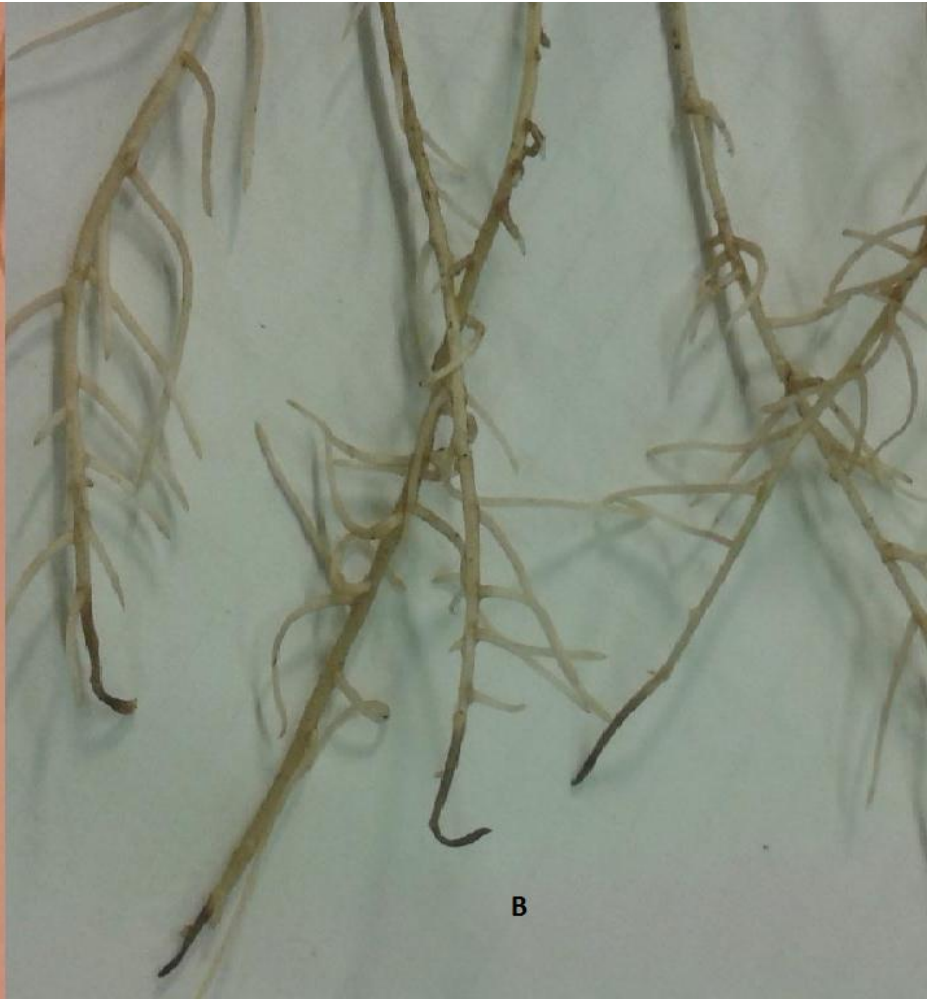

Supplement: Supplement_Figure_root_regrowth_and_root_tip_memebrane_damage.pdf [file Supplement_Figure_root_regrowth_and_root_tip_memebrane_damage.pdf]
