# Supplementary material for: Screening of faba bean (Vicia faba L.) accessions to acidity and aluminium stresses
Source: PeerJ. 2017 Feb 8;5:e2963. doi: 10.7717/peerj.2963 (PMC5301972; doi:10.7717/peerj.2963)
Supplement: Table S1 [file peerj-05-2963-s004.xlsx]

## Sheet: ANOVA ChlCont & Taproot length
ANOVA Table for Chlorophyll content and Taproot length in perlite grown plants
Source of variation	df	Mean square
		Chlorophyll content		Taproot length
Treatment	2	69.992	**	596.804	**
Replicate	3	9.506	ns	83.3296	ns
Main plot residual	6	2.244		51.7963
Accession	9	48.777	***	40.2432	ns
Treatment x Accession	18	16.306	**	59.0506	**
Subplot residual	81	7.394		25.727
